# Supplementary material
Source: MDPI journal article supplement (https://www.mdpi.com/2071-1050/15/4/3672)
Supplement: s1 [file s1]

**Table S1.** Details of Michelin Three-Star Restaurants ( $n = 141$ ).

| Name                                           | Location       | Website address                                                                                                                                                                                 |
|------------------------------------------------|----------------|-------------------------------------------------------------------------------------------------------------------------------------------------------------------------------------------------|
| Amador                                         | Austria        | <a href="https://www.restaurant-amador.com/">https://www.restaurant-amador.com/</a>                                                                                                             |
| Zilte                                          | Belgium        | <a href="https://www.zilte.be/">https://www.zilte.be/</a>                                                                                                                                       |
| Hof van Cleve                                  | Belgium        | <a href="https://hofvancleve.com/">https://hofvancleve.com/</a>                                                                                                                                 |
| Boury                                          | Belgium        | <a href="https://www.restaurantboury.be/">https://www.restaurantboury.be/</a>                                                                                                                   |
| Taian                                          | China Mainland | N                                                                                                                                                                                               |
| Taian Table (SH)                               | China Mainland | <a href="https://taian-table.cn/">https://taian-table.cn/</a>                                                                                                                                   |
| Ultraviolet by Paul Pairet                     | China Mainland | <a href="https://uvbypp.cc/">https://uvbypp.cc/</a>                                                                                                                                             |
| Xin Rong Ji (Xinyuan South Road)               | China Mainland | N                                                                                                                                                                                               |
| King's Joy                                     | China Mainland | N                                                                                                                                                                                               |
| noma                                           | Denmark        | <a href="https://noma.dk/">https://noma.dk/</a>                                                                                                                                                 |
| Geranium                                       | Denmark        | <a href="https://www.geranium.dk/">https://www.geranium.dk/</a>                                                                                                                                 |
| Mirazur                                        | France         | <a href="https://www.mirazur.fr/">https://www.mirazur.fr/</a>                                                                                                                                   |
| Le Louis XV - Alain Ducasse à l'Hôtel de Paris | France         | <a href="https://www.ducasse-paris.com/">https://www.ducasse-paris.com/</a>                                                                                                                     |
| Flocons de Sel                                 | France         | <a href="https://www.floconsdesel.com/fr/">https://www.floconsdesel.com/fr/</a>                                                                                                                 |
| La Vague d'Or - Cheval Blanc St-Tropez         | France         | <a href="https://www.chevalblanc.com/en/">https://www.chevalblanc.com/en/</a>                                                                                                                   |
| Le 1947 à Cheval Blanc                         | France         | <a href="https://www.chevalblanc.com/fr/maison/courchevel/">https://www.chevalblanc.com/fr/maison/courchevel/</a>                                                                               |
| René et Maxime Meilleur                        | France         | <a href="https://www.la-bouitte.com/fr/">https://www.la-bouitte.com/fr/</a>                                                                                                                     |
| Le Clos des Sens                               | France         | <a href="https://www.closdessens.com/">https://www.closdessens.com/</a>                                                                                                                         |
| Assiette Champenoise                           | France         | <a href="https://www.assiettechampenoise.com/">https://www.assiettechampenoise.com/</a>                                                                                                         |
| Christophe Bacquie                             | France         | <a href="https://www.hotelducastellet.net/fr/restaurants/restaurant-christophe-bacque.html">https://www.hotelducastellet.net/fr/restaurants/restaurant-christophe-bacque.html</a>               |
| La Villa Madie                                 | France         | <a href="https://lavillamadie.com/">https://lavillamadie.com/</a>                                                                                                                               |
| AM par Alexandre Mazzia                        | France         | <a href="https://www.alexandre-mazzia.com/">https://www.alexandre-mazzia.com/</a>                                                                                                               |
| Le Petit Nice                                  | France         | <a href="https://www.passedat.fr/en/5-star-boutique-hotel-restaurant-marseille">https://www.passedat.fr/en/5-star-boutique-hotel-restaurant-marseille</a>                                       |
| Maison Lameloise                               | France         | <a href="https://www.lameloise.fr/">https://www.lameloise.fr/</a>                                                                                                                               |
| Georges Blanc                                  | France         | <a href="https://www.georgesblanc.com/fr/">https://www.georgesblanc.com/fr/</a>                                                                                                                 |
| Pic                                            | France         | <a href="https://anne-sophie-pic.com/">https://anne-sophie-pic.com/</a>                                                                                                                         |
| L'Oustau de Baumanière                         | France         | <a href="https://www.baumaniere.com/">https://www.baumaniere.com/</a>                                                                                                                           |
| Régis et Jacques Marcon                        | France         | <a href="https://www.lesmaisonsmarcon.fr/">https://www.lesmaisonsmarcon.fr/</a>                                                                                                                 |
| L'Ambroisie                                    | France         | <a href="https://www.ambroisie-paris.com/">https://www.ambroisie-paris.com/</a>                                                                                                                 |
| Kei                                            | France         | <a href="https://www.restaurant-kei.fr/">https://www.restaurant-kei.fr/</a>                                                                                                                     |
| Plénitude - Cheval Blanc Paris                 | France         | <a href="https://www.chevalblanc.com/en/">https://www.chevalblanc.com/en/</a>                                                                                                                   |
| Guy Savoy                                      | France         | <a href="https://www.guysavoy.com/">https://www.guysavoy.com/</a>                                                                                                                               |
| Épicure                                        | France         | <a href="https://www.oetkercollection.com/fr/hotels/le-bristol-paris/restaurants-et-bar/epicure/">https://www.oetkercollection.com/fr/hotels/le-bristol-paris/restaurants-et-bar/epicure/</a>   |
| Alléno Paris au Pavillon Ledoyen               | France         | <a href="https://www.yannick-alleno.com/">https://www.yannick-alleno.com/</a>                                                                                                                   |
| Pierre Gagnaire                                | France         | <a href="https://pierregagnaire.com/restaurants/pierre_gagnaire">https://pierregagnaire.com/restaurants/pierre_gagnaire</a>                                                                     |
| Arpège                                         | France         | <a href="https://www.alain-passard.com/">https://www.alain-passard.com/</a>                                                                                                                     |
| Le Cinq                                        | France         | <a href="https://www.fourseasons.com/paris/dining/restaurants/le_cinq/?seo=google_local_par2_emea">https://www.fourseasons.com/paris/dining/restaurants/le_cinq/?seo=google_local_par2_emea</a> |
| Le Pré Catelan                                 | France         | <a href="https://www.leprecatelan.com/">https://www.leprecatelan.com/</a>                                                                                                                       |
| Troisgros - Le Bois sans Feuilles              | France         | <a href="https://www.troisgros.com/">https://www.troisgros.com/</a>                                                                                                                             |
| Auberge du Vieux Puits                         | France         | <a href="https://www.aubergeduvieuxpuits.fr/fr/">https://www.aubergeduvieuxpuits.fr/fr/</a>                                                                                                     |
| Christopher Coutanceau                         | France         | <a href="https://www.coutanceaularochelle.com/">https://www.coutanceaularochelle.com/</a>                                                                                                       |
| Les Prés d'Eugénie - Michel Guérard            | France         | <a href="https://lespresdeugenie.com/">https://lespresdeugenie.com/</a>                                                                                                                         |
| Rutz                                           | Germany        | <a href="https://rutz-restaurant.de/">https://rutz-restaurant.de/</a>                                                                                                                           |
| The Table Kevin Fehling                        | Germany        | <a href="https://thetable-hamburg.de/">https://thetable-hamburg.de/</a>                                                                                                                         |
| Aqua                                           | Germany        | <a href="http://www.restaurant-aqua.com/">http://www.restaurant-aqua.com/</a>                                                                                                                   |
| Restaurant Überfahrt Christian Jürgens         | Germany        | <a href="https://www.althoffcollection.com/de">https://www.althoffcollection.com/de</a>                                                                                                         |
| Schwarzwaldstube                               | Germany        | <a href="https://www.traube-tonbach.de/restaurants-bar/schwarzwaldstube/">https://www.traube-tonbach.de/restaurants-bar/schwarzwaldstube/</a>                                                   |
| Restaurant Bareiss                             | Germany        | <a href="https://www.bareiss.com/">https://www.bareiss.com/</a>                                                                                                                                 |

|                                       |             |                                                                                                                               |
|---------------------------------------|-------------|-------------------------------------------------------------------------------------------------------------------------------|
| schanz. restaurant.                   | Germany     | <a href="https://www.schanz-restaurant.de/de/">https://www.schanz-restaurant.de/de/</a>                                       |
| Waldhotel Sonnora                     | Germany     | <a href="https://www.hotel-sonnora.de/">https://www.hotel-sonnora.de/</a>                                                     |
| Victor's Fine Dining by christian bau | Germany     | <a href="https://www.victors-fine-dining.de/">https://www.victors-fine-dining.de/</a>                                         |
| Forum                                 | Hong Kong   | <a href="http://www.forumrestaurant1977.com/">http://www.forumrestaurant1977.com/</a>                                         |
| 8 1/2 Otto e Mezzo - Bombana          | Hong Kong   | <a href="http://otto.laisun.com/hong-kong/en/the-restaurant/">http://otto.laisun.com/hong-kong/en/the-restaurant/</a>         |
| L'Atelier de Joël Robuchon            | Hong Kong   | <a href="https://www.robuchon.hk/">https://www.robuchon.hk/</a>                                                               |
| Sushi Shikon                          | Hong Kong   | <a href="https://sushi-shikon.com/">https://sushi-shikon.com/</a>                                                             |
| Caprice                               | Hong Kong   | <a href="https://www.fourseasons.com/hongkong/">https://www.fourseasons.com/hongkong/</a>                                     |
| Lung King Heen                        | Hong Kong   | <a href="https://www.fourseasons.com/hongkong/">https://www.fourseasons.com/hongkong/</a>                                     |
| T'ang Court                           | Hong Kong   | <a href="https://www.langhamhotels.com/en/the-langham/hong-kong/">https://www.langhamhotels.com/en/the-langham/hong-kong/</a> |
| Reale                                 | Italy       | <a href="https://www.nikoromito.com/reale/">https://www.nikoromito.com/reale/</a>                                             |
| Uliassi                               | Italy       | <a href="https://www.uliassi.com/">https://www.uliassi.com/</a>                                                               |
| La Pergola                            | Italy       | <a href="https://romecavalieri.com/la-pergola/">https://romecavalieri.com/la-pergola/</a>                                     |
| St. Hubertus                          | Italy       | <a href="https://www.st-hubertus.it/">https://www.st-hubertus.it/</a>                                                         |
| Le Calandre                           | Italy       | <a href="https://alajmo.it/">https://alajmo.it/</a>                                                                           |
| Enoteca Pinchiorri                    | Italy       | <a href="https://www.enotecapinchiorri.it/">https://www.enotecapinchiorri.it/</a>                                             |
| Osteria Francescana                   | Italy       | <a href="https://osteriafrancescana.it/">https://osteriafrancescana.it/</a>                                                   |
| Dal Pescatore                         | Italy       | <a href="https://www.dalpescatore.com/">https://www.dalpescatore.com/</a>                                                     |
| Da Vittorio                           | Italy       | <a href="https://www.davittorio.com/">https://www.davittorio.com/</a>                                                         |
| Enrico Bartolini al Mudec             | Italy       | <a href="https://www.enricobartolini.net/">https://www.enricobartolini.net/</a>                                               |
| Villa Crespi                          | Italy       | <a href="http://www.villacrespi.it/">http://www.villacrespi.it/</a>                                                           |
| Piazza Duomo                          | Italy       | <a href="https://www.piazzaduomoalba.it/it/">https://www.piazzaduomoalba.it/it/</a>                                           |
| Makimura                              | Japan       | N                                                                                                                             |
| Quintessence                          | Japan       | <a href="https://www.quintessence.jp/">https://www.quintessence.jp/</a>                                                       |
| Joël Robuchon                         | Japan       | <a href="https://www.robuchon.jp/">https://www.robuchon.jp/</a>                                                               |
| Sazenka                               | Japan       | <a href="https://sazenka.com/">https://sazenka.com/</a>                                                                       |
| Azabu Kadowaki                        | Japan       | N                                                                                                                             |
| Sushi Yoshitake                       | Japan       | <a href="http://sushi-yoshitake.com/">http://sushi-yoshitake.com/</a>                                                         |
| L'OSIER                               | Japan       | <a href="https://losier.shiseido.co.jp/">https://losier.shiseido.co.jp/</a>                                                   |
| Kanda                                 | Japan       | <a href="http://www.nihonryori-kanda.com/">http://www.nihonryori-kanda.com/</a>                                               |
| RyuGin                                | Japan       | <a href="https://www.nihonryori-ryugin.com/">https://www.nihonryori-ryugin.com/</a>                                           |
| L'Effervescence                       | Japan       | <a href="http://www.leffervescence.jp/">http://www.leffervescence.jp/</a>                                                     |
| Kohaku                                | Japan       | <a href="http://kagurazaka-kohaku.jp/">http://kagurazaka-kohaku.jp/</a>                                                       |
| Kagurazaka Ishikawa                   | Japan       | <a href="http://www.kagurazaka-ishikawa.co.jp/">http://www.kagurazaka-ishikawa.co.jp/</a>                                     |
| HAJIME                                | Japan       | <a href="http://www.hajime-artistes.com/">http://www.hajime-artistes.com/</a>                                                 |
| Kashiwaya                             | Japan       | <a href="https://jp-kashiwaya.com/">https://jp-kashiwaya.com/</a>                                                             |
| Kikunoi Honten                        | Japan       | <a href="https://kikunoi.jp/">https://kikunoi.jp/</a>                                                                         |
| Gion Sasaki                           | Japan       | <a href="http://gionsasaki.com/">http://gionsasaki.com/</a>                                                                   |
| Mizai                                 | Japan       | <a href="https://mizai.jp/">https://mizai.jp/</a>                                                                             |
| Maeda                                 | Japan       | N                                                                                                                             |
| Hyotei                                | Japan       | <a href="http://hyotei.co.jp/">http://hyotei.co.jp/</a>                                                                       |
| Isshisoden Nakamura                   | Japan       | <a href="http://www.kyoryori-nakamura.com/">http://www.kyoryori-nakamura.com/</a>                                             |
| Jade Dragon                           | Macau       | <a href="https://www.cityofdreamsmacau.com/">https://www.cityofdreamsmacau.com/</a>                                           |
| Robuchon au Dôme                      | Macau       | <a href="https://www.grandlisboahotels.com/">https://www.grandlisboahotels.com/</a>                                           |
| The Eight                             | Macau       | <a href="https://www.grandlisboahotels.com/">https://www.grandlisboahotels.com/</a>                                           |
| De Librije                            | Netherlands | <a href="https://www.librije.com/">https://www.librije.com/</a>                                                               |
| Inter Scaldes                         | Netherlands | <a href="https://www.interscaldes.nl/">https://www.interscaldes.nl/</a>                                                       |
| Maaemo                                | Norway      | <a href="http://www.maaemo.no/">http://www.maaemo.no/</a>                                                                     |
| Odette                                | Singapore   | <a href="http://www.odetterestaurant.com/">http://www.odetterestaurant.com/</a>                                               |
| Zén                                   | Singapore   | <a href="http://www.restaurantzen.com/">http://www.restaurantzen.com/</a>                                                     |
| Les Amis                              | Singapore   | <a href="https://www.lesamis.com.sg/">https://www.lesamis.com.sg/</a>                                                         |
| Gaon                                  | Korea       | <a href="http://gaonkr.com/">http://gaonkr.com/</a>                                                                           |
| Mosu                                  | Korea       | <a href="http://mosuseoul.com/">http://mosuseoul.com/</a>                                                                     |
| El Celler de Can Roca                 | Spain       | <a href="http://www.cellercanroca.com/">http://www.cellercanroca.com/</a>                                                     |
| Lasarte                               | Spain       | <a href="https://www.restaurantlasarte.com/">https://www.restaurantlasarte.com/</a>                                           |
| Cocina Hermanos Torres                | Spain       | <a href="http://www.cocinahermanostorres.com/">http://www.cocinahermanostorres.com/</a>                                       |
| ABaC                                  | Spain       | <a href="https://abacrestaurant.com/es">https://abacrestaurant.com/es</a>                                                     |

|                                     |                |                                                                                                                                                                                   |
|-------------------------------------|----------------|-----------------------------------------------------------------------------------------------------------------------------------------------------------------------------------|
| Quique Dacosta                      | Spain          | <a href="https://www.quiquedacosta.es/">https://www.quiquedacosta.es/</a>                                                                                                         |
| Aponiente                           | Spain          | <a href="https://www.aponiente.com/">https://www.aponiente.com/</a>                                                                                                               |
| Atrio                               | Spain          | <a href="https://restauranteatrío.com/">https://restauranteatrío.com/</a>                                                                                                         |
| DiverXO                             | Spain          | <a href="https://diverxo.com/">https://diverxo.com/</a>                                                                                                                           |
| Arzak                               | Spain          | <a href="http://www.arzak.es/">http://www.arzak.es/</a>                                                                                                                           |
| Martín Berasategui                  | Spain          | <a href="http://www.martinberasategui.com/">http://www.martinberasategui.com/</a>                                                                                                 |
| Akelaře                             | Spain          | <a href="https://akelarre.net/">https://akelarre.net/</a>                                                                                                                         |
| Azurmendi                           | Spain          | <a href="http://www.azurmendi.restaurant/">http://www.azurmendi.restaurant/</a>                                                                                                   |
| Cenador de Amós                     | Spain          | <a href="https://www.cenadordeamos.com/">https://www.cenadordeamos.com/</a>                                                                                                       |
| Frantzén                            | Sweden         | <a href="https://www.restaurantfrantzen.com/">https://www.restaurantfrantzen.com/</a>                                                                                             |
| Memories                            | Switzerland    | <a href="https://memories.ch/">https://memories.ch/</a>                                                                                                                           |
| Schloss Schauenstein                | Switzerland    | <a href="https://schauenstein.ch/">https://schauenstein.ch/</a>                                                                                                                   |
| Cheval Blanc by Peter Knogl         | Switzerland    | <a href="https://www.chevalblancbasel.com/en">https://www.chevalblancbasel.com/en</a>                                                                                             |
| Restaurant de l'Hôtel de Ville      | Switzerland    | <a href="https://www.restaurantcrissier.com/">https://www.restaurantcrissier.com/</a>                                                                                             |
| Le Palais                           | Taipei         | <a href="https://www.palaisdechinehotel.com/en/index.php">https://www.palaisdechinehotel.com/en/index.php</a>                                                                     |
| L'Enclume                           | United Kingdom | <a href="https://www.lenclume.co.uk/">https://www.lenclume.co.uk/</a>                                                                                                             |
| Sketch (The Lecture Room & Library) | United Kingdom | <a href="https://sketch.london/">https://sketch.london/</a>                                                                                                                       |
| Hélène Darroze at The Connaught     | United Kingdom | <a href="https://www.the-connaught.co.uk/restaurants-bars/helene-darroze-at-the-connaught/">https://www.the-connaught.co.uk/restaurants-bars/helene-darroze-at-the-connaught/</a> |
| Alain Ducasse at The Dorchester     | United Kingdom | <a href="https://www.alainducasse-dorchester.com/">https://www.alainducasse-dorchester.com/</a>                                                                                   |
| CORE by Clare Smyth                 | United Kingdom | <a href="https://www.corebyclaresmyth.com/">https://www.corebyclaresmyth.com/</a>                                                                                                 |
| Restaurant Gordon Ramsay            | United Kingdom | <a href="https://www.gordonramsayrestaurants.com/restaurant-gordon-ramsay/">https://www.gordonramsayrestaurants.com/restaurant-gordon-ramsay/</a>                                 |
| Waterside Inn                       | United Kingdom | <a href="https://www.waterside-inn.co.uk/">https://www.waterside-inn.co.uk/</a>                                                                                                   |
| Fat Duck                            | United Kingdom | <a href="https://thefatduck.co.uk/">https://thefatduck.co.uk/</a>                                                                                                                 |
| Manresa                             | USA            | <a href="https://www.manresarestaurant.com/">https://www.manresarestaurant.com/</a>                                                                                               |
| Atelier Crenn                       | USA            | <a href="https://www.ateliercrenn.com/">https://www.ateliercrenn.com/</a>                                                                                                         |
| Benu                                | USA            | <a href="https://www.benusf.com/">https://www.benusf.com/</a>                                                                                                                     |
| Quince                              | USA            | <a href="http://www.quincerestaurant.com/">http://www.quincerestaurant.com/</a>                                                                                                   |
| Single Thread                       | USA            | <a href="https://www.singlethreadfarms.com/">https://www.singlethreadfarms.com/</a>                                                                                               |
| The French Laundry                  | USA            | <a href="https://www.thomaskeller.com/tfl">https://www.thomaskeller.com/tfl</a>                                                                                                   |
| Alinea                              | USA            | <a href="https://www.alinearestaurant.com/">https://www.alinearestaurant.com/</a>                                                                                                 |
| The Inn at Little Washington        | USA            | <a href="https://www.theinnatlittlewashington.com/">https://www.theinnatlittlewashington.com/</a>                                                                                 |
| Eleven Madison Park                 | USA            | <a href="https://www.elevenmadisonpark.com/">https://www.elevenmadisonpark.com/</a>                                                                                               |
| Chef's Table at Brooklyn Fare       | USA            | <a href="https://www.brooklynfare.com/">https://www.brooklynfare.com/</a>                                                                                                         |
| Le Bernardin                        | USA            | <a href="https://www.le-bernardin.com/">https://www.le-bernardin.com/</a>                                                                                                         |
| Per Se                              | USA            | <a href="https://www.thomaskeller.com/perseny">https://www.thomaskeller.com/perseny</a>                                                                                           |
| Masa                                | USA            | <a href="https://www.masanyc.com/">https://www.masanyc.com/</a>                                                                                                                   |
